# Supplementary material for: A genome wide survey reveals multiple nematocyst-specific genes in Myxozoa
Source: PubMed Central journal article supplement (PMC6134521; doi:10.1186/s12862-018-1253-7), 2018-09-12

# Nematocyst-specific protein 6

Metazoan subtilisin-like proprotein convertases

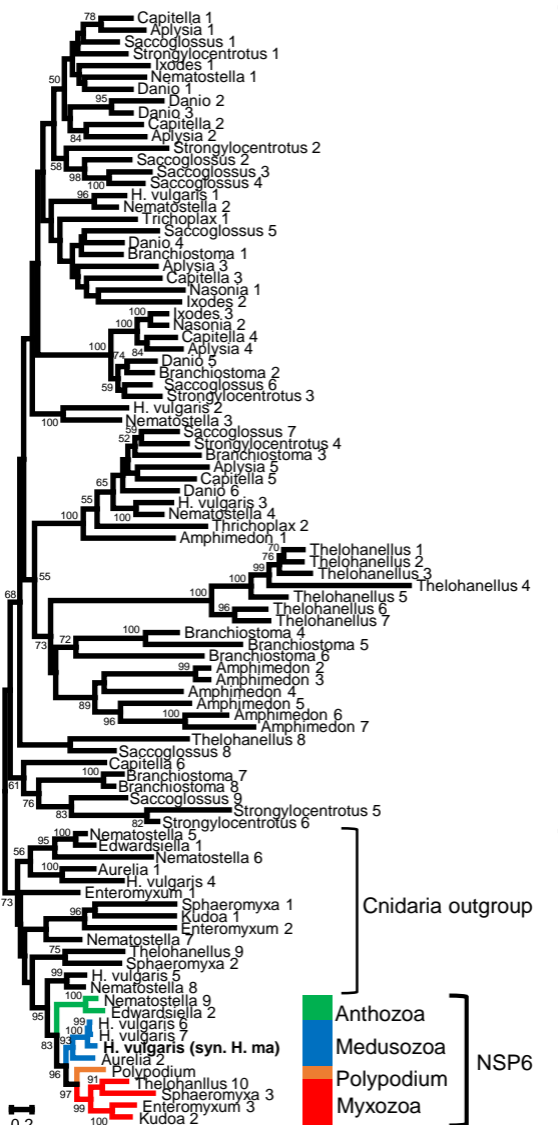

Supplement: 12862_2018_1253_MOESM1_ESM.pdf [file 12862_2018_1253_MOESM1_ESM.pdf]
